# Supplementary material
Source: publisher figshare collection journal article supplement (https://tandf.figshare.com/articles/dataset/_/7268435)

# Supplementary Data

**Suppl. Fig. 1 Involvement of CR4 in internalization of C-opsonized conidia.** Not only CR3, but also CR4 participates in the up-take of opsonized fungal conidia (green) devoid of either DHN-melanin ( $\Delta pksP$ -C) or  $\beta$ -1,3-glucan ( $fks_{tetOn}^{rep}$ -C) as detected by fluorescent staining of the CR4  $\alpha$ -chain, CD11c (yellow). DC-SIGN (red) co-localized with germinating fungi (arrows in the  $fks_{tetOn}^{rep}$  panel). Nuclei are stained in blue using H $\ddot{o}$ chst. As already observed for CR3 staining experiments, complement-opsonization of fungal conidia caused an accumulation of the spores within DCs independent on the cell surface (2<sup>nd</sup> and 4<sup>th</sup> panel) compared to their non-opsonized counterparts (1<sup>st</sup> and 3<sup>rd</sup> panel). An overview of about 10 cells per condition is illustrated in this figure. Scale bar represents 10 $\mu$ m.

Suppl. Fig.1

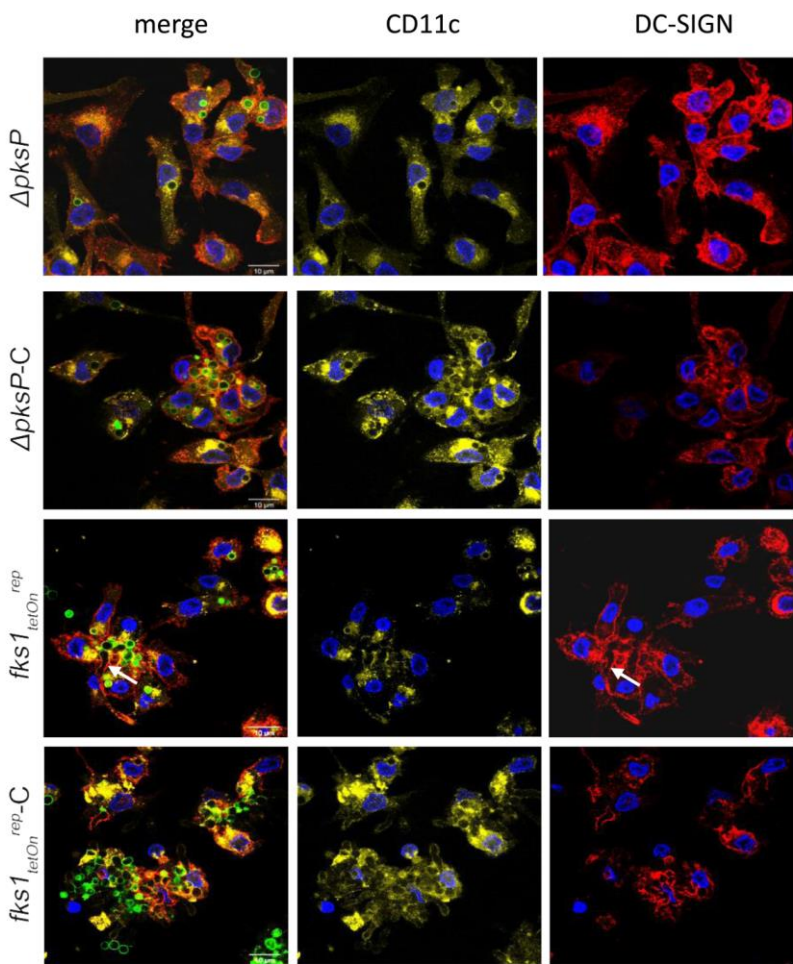

**Supplementary Figure 2 A pro-inflammatory cytokine pattern is induced in DCs exposed to *fks1<sub>tetOn</sub><sup>rep</sup>* SN.** Real-time PCR analyses revealed that IL1B (upper, left), IL6 (lower, left), and IL23A (upper, right) mRNA expression are elevated to significantly higher levels in DCs exposed to the SN of *fks1<sub>tetOn</sub><sup>rep</sup>* compared to its respective WT Afs35. IL10 mRNA expression levels were not or only slightly changed by treatment with SNs from Afs35, *fks1<sub>tetOn</sub><sup>rep</sup>* or galactomannan (20 µg/ml) compared to chitin (10 µg/ml)-treated DC controls. One representative donor out of three is shown and statistical analyses were performed using GraphPad Prism Software.

Suppl. Fig.2

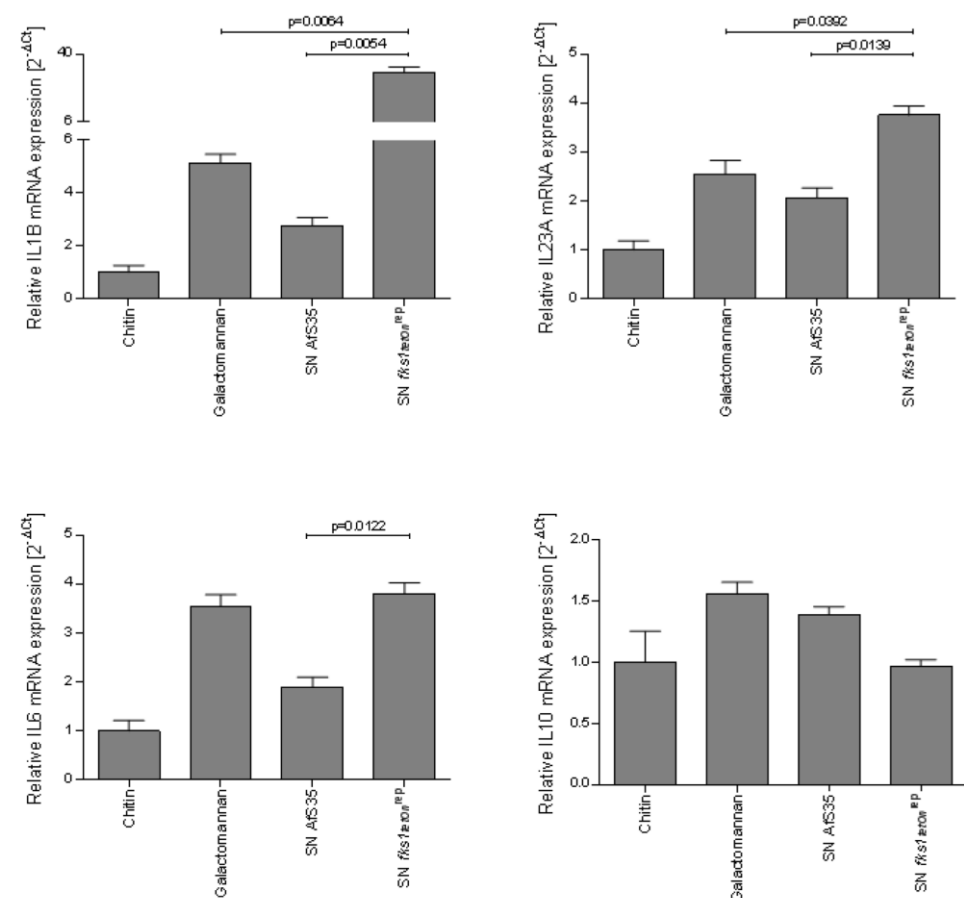

Supplement: Supplementary file 1 [file 3]
