# Supplementary material
Source: publisher figshare collection journal article supplement (https://tandf.figshare.com/articles/dataset/_/7268435)
Supplement: Supplementary file 2 [file 3]

Archive with 4 entries (4 files):
- Suppl Figure 1.tif
- Suppl Figure 2.tif
- Suppl Figure 3.tif
- Supplementary Data.pdf
