# Supplementary material
Source: publisher figshare collection journal article supplement (https://tandf.figshare.com/articles/dataset/_/7268435)

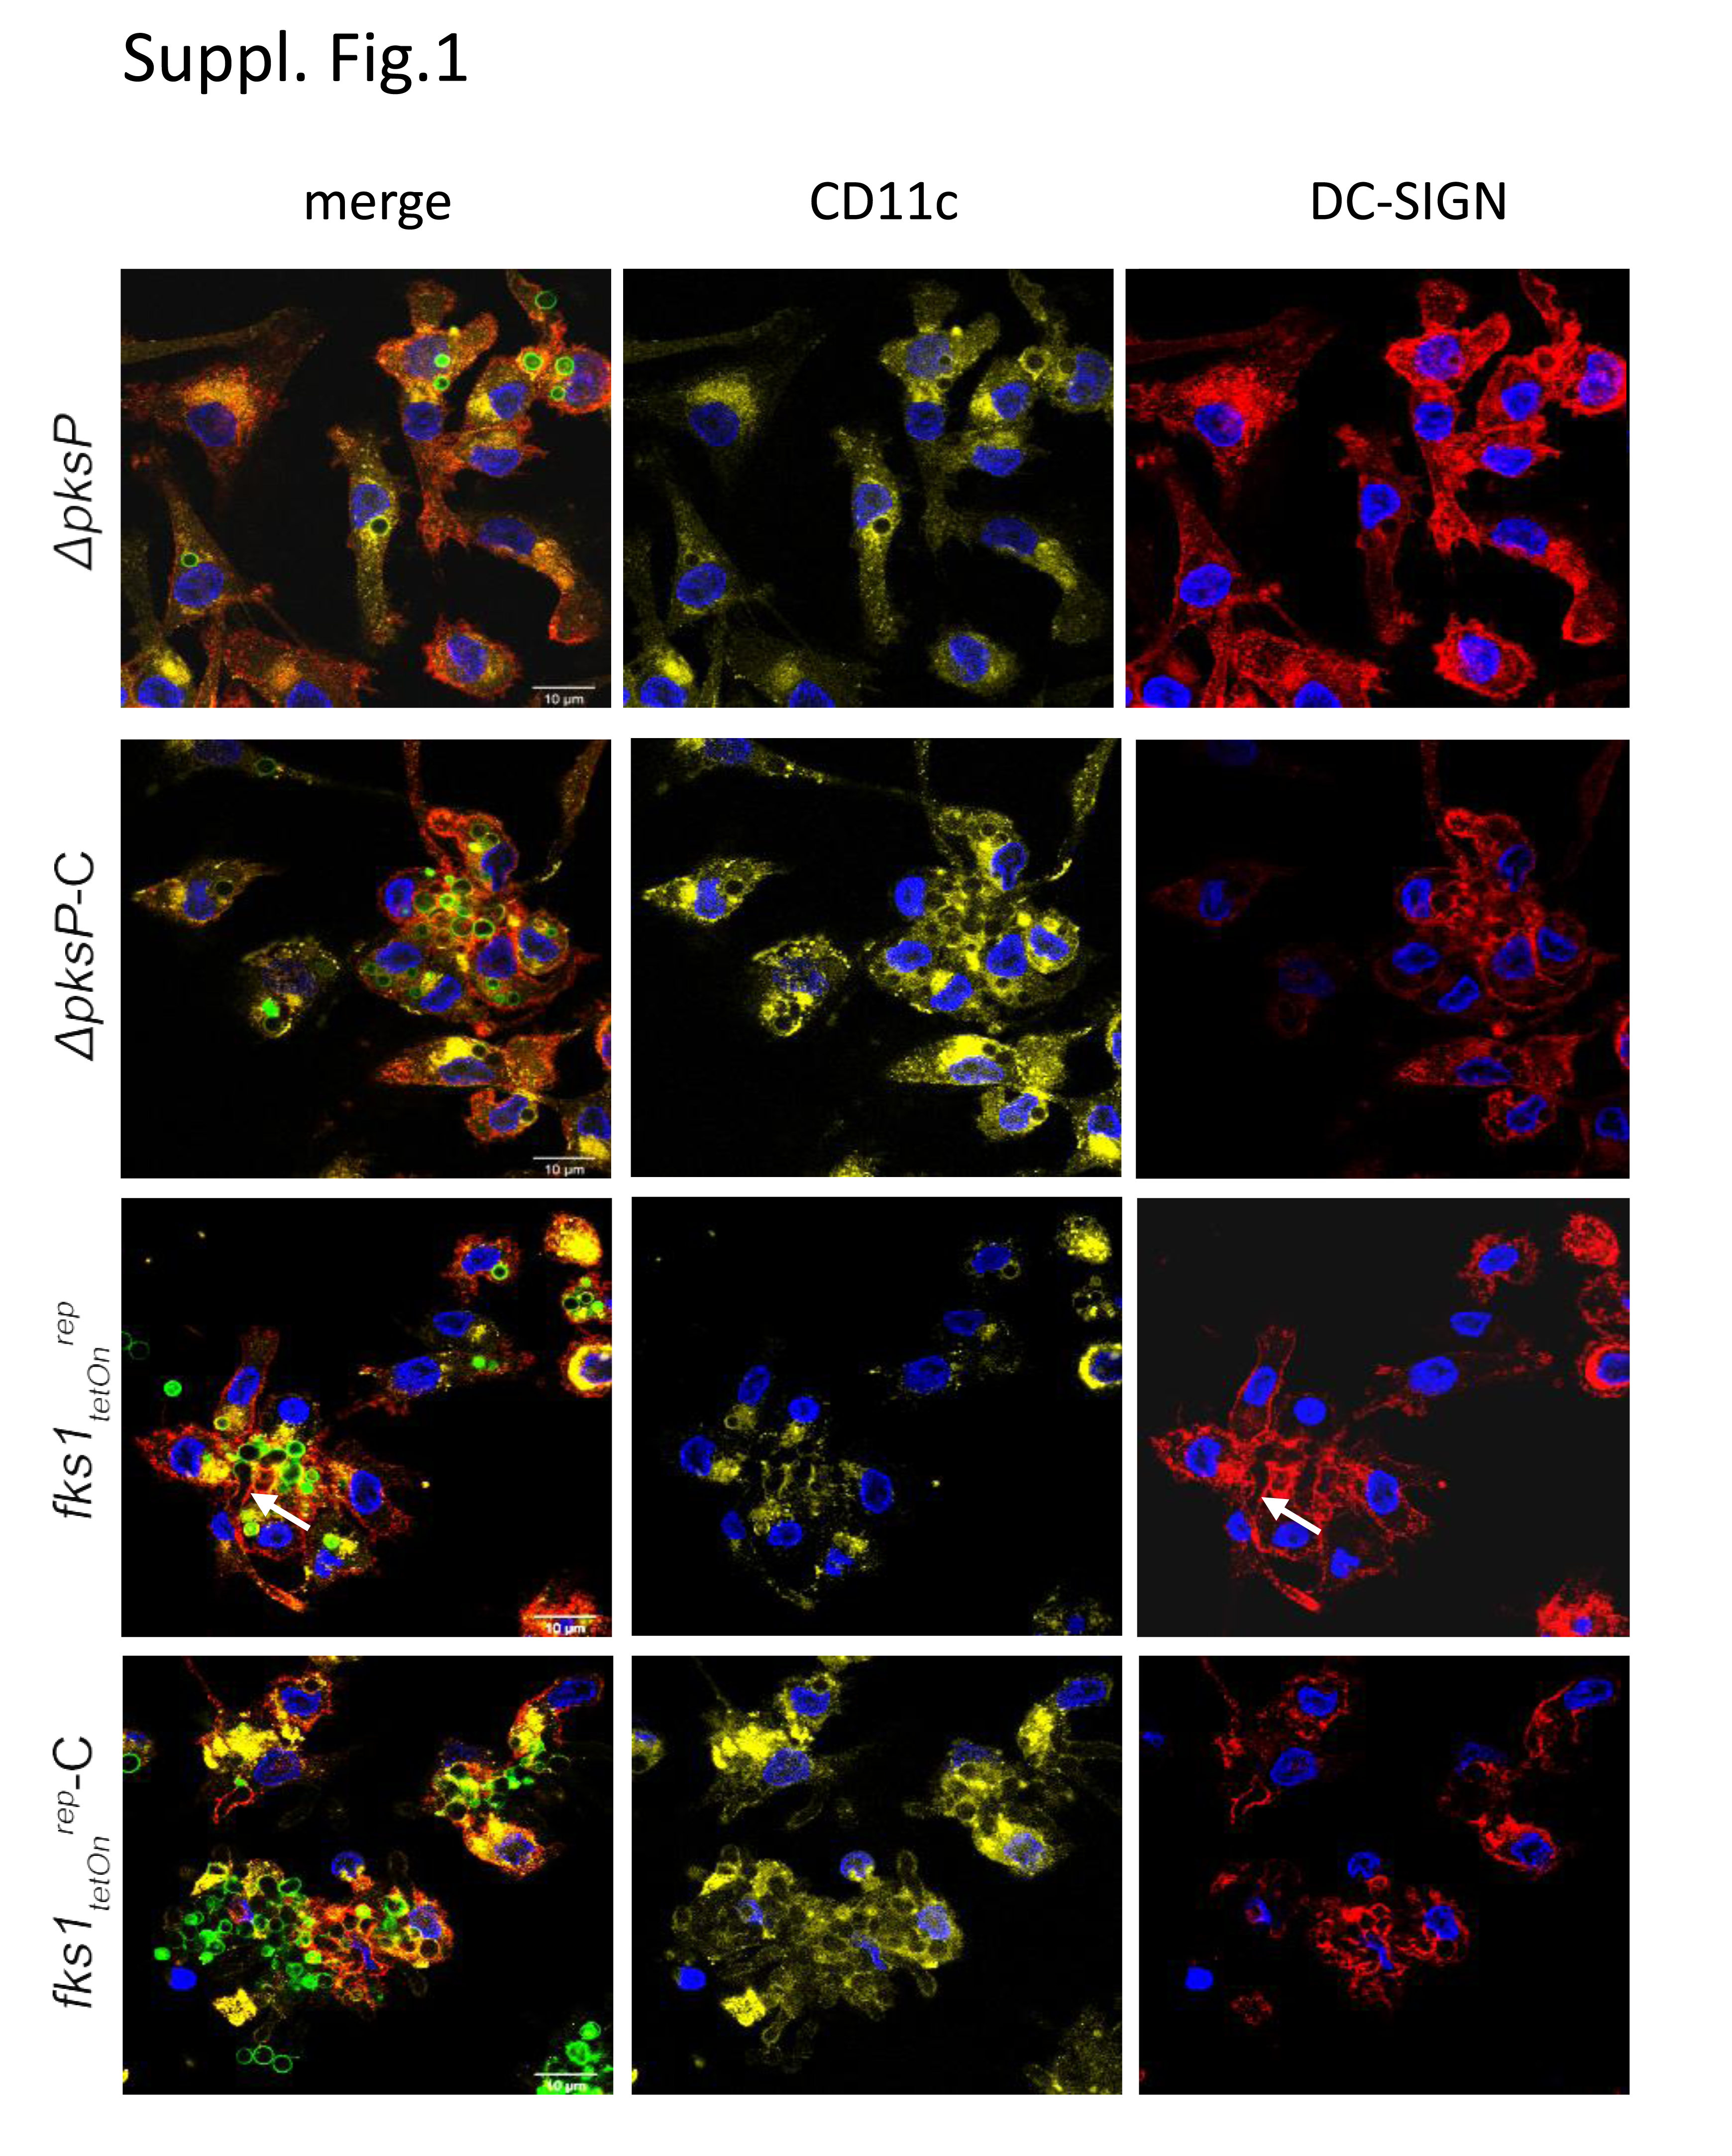

Supplement: Supplementary file 2 [file 3 › Suppl Figure 1.tif]

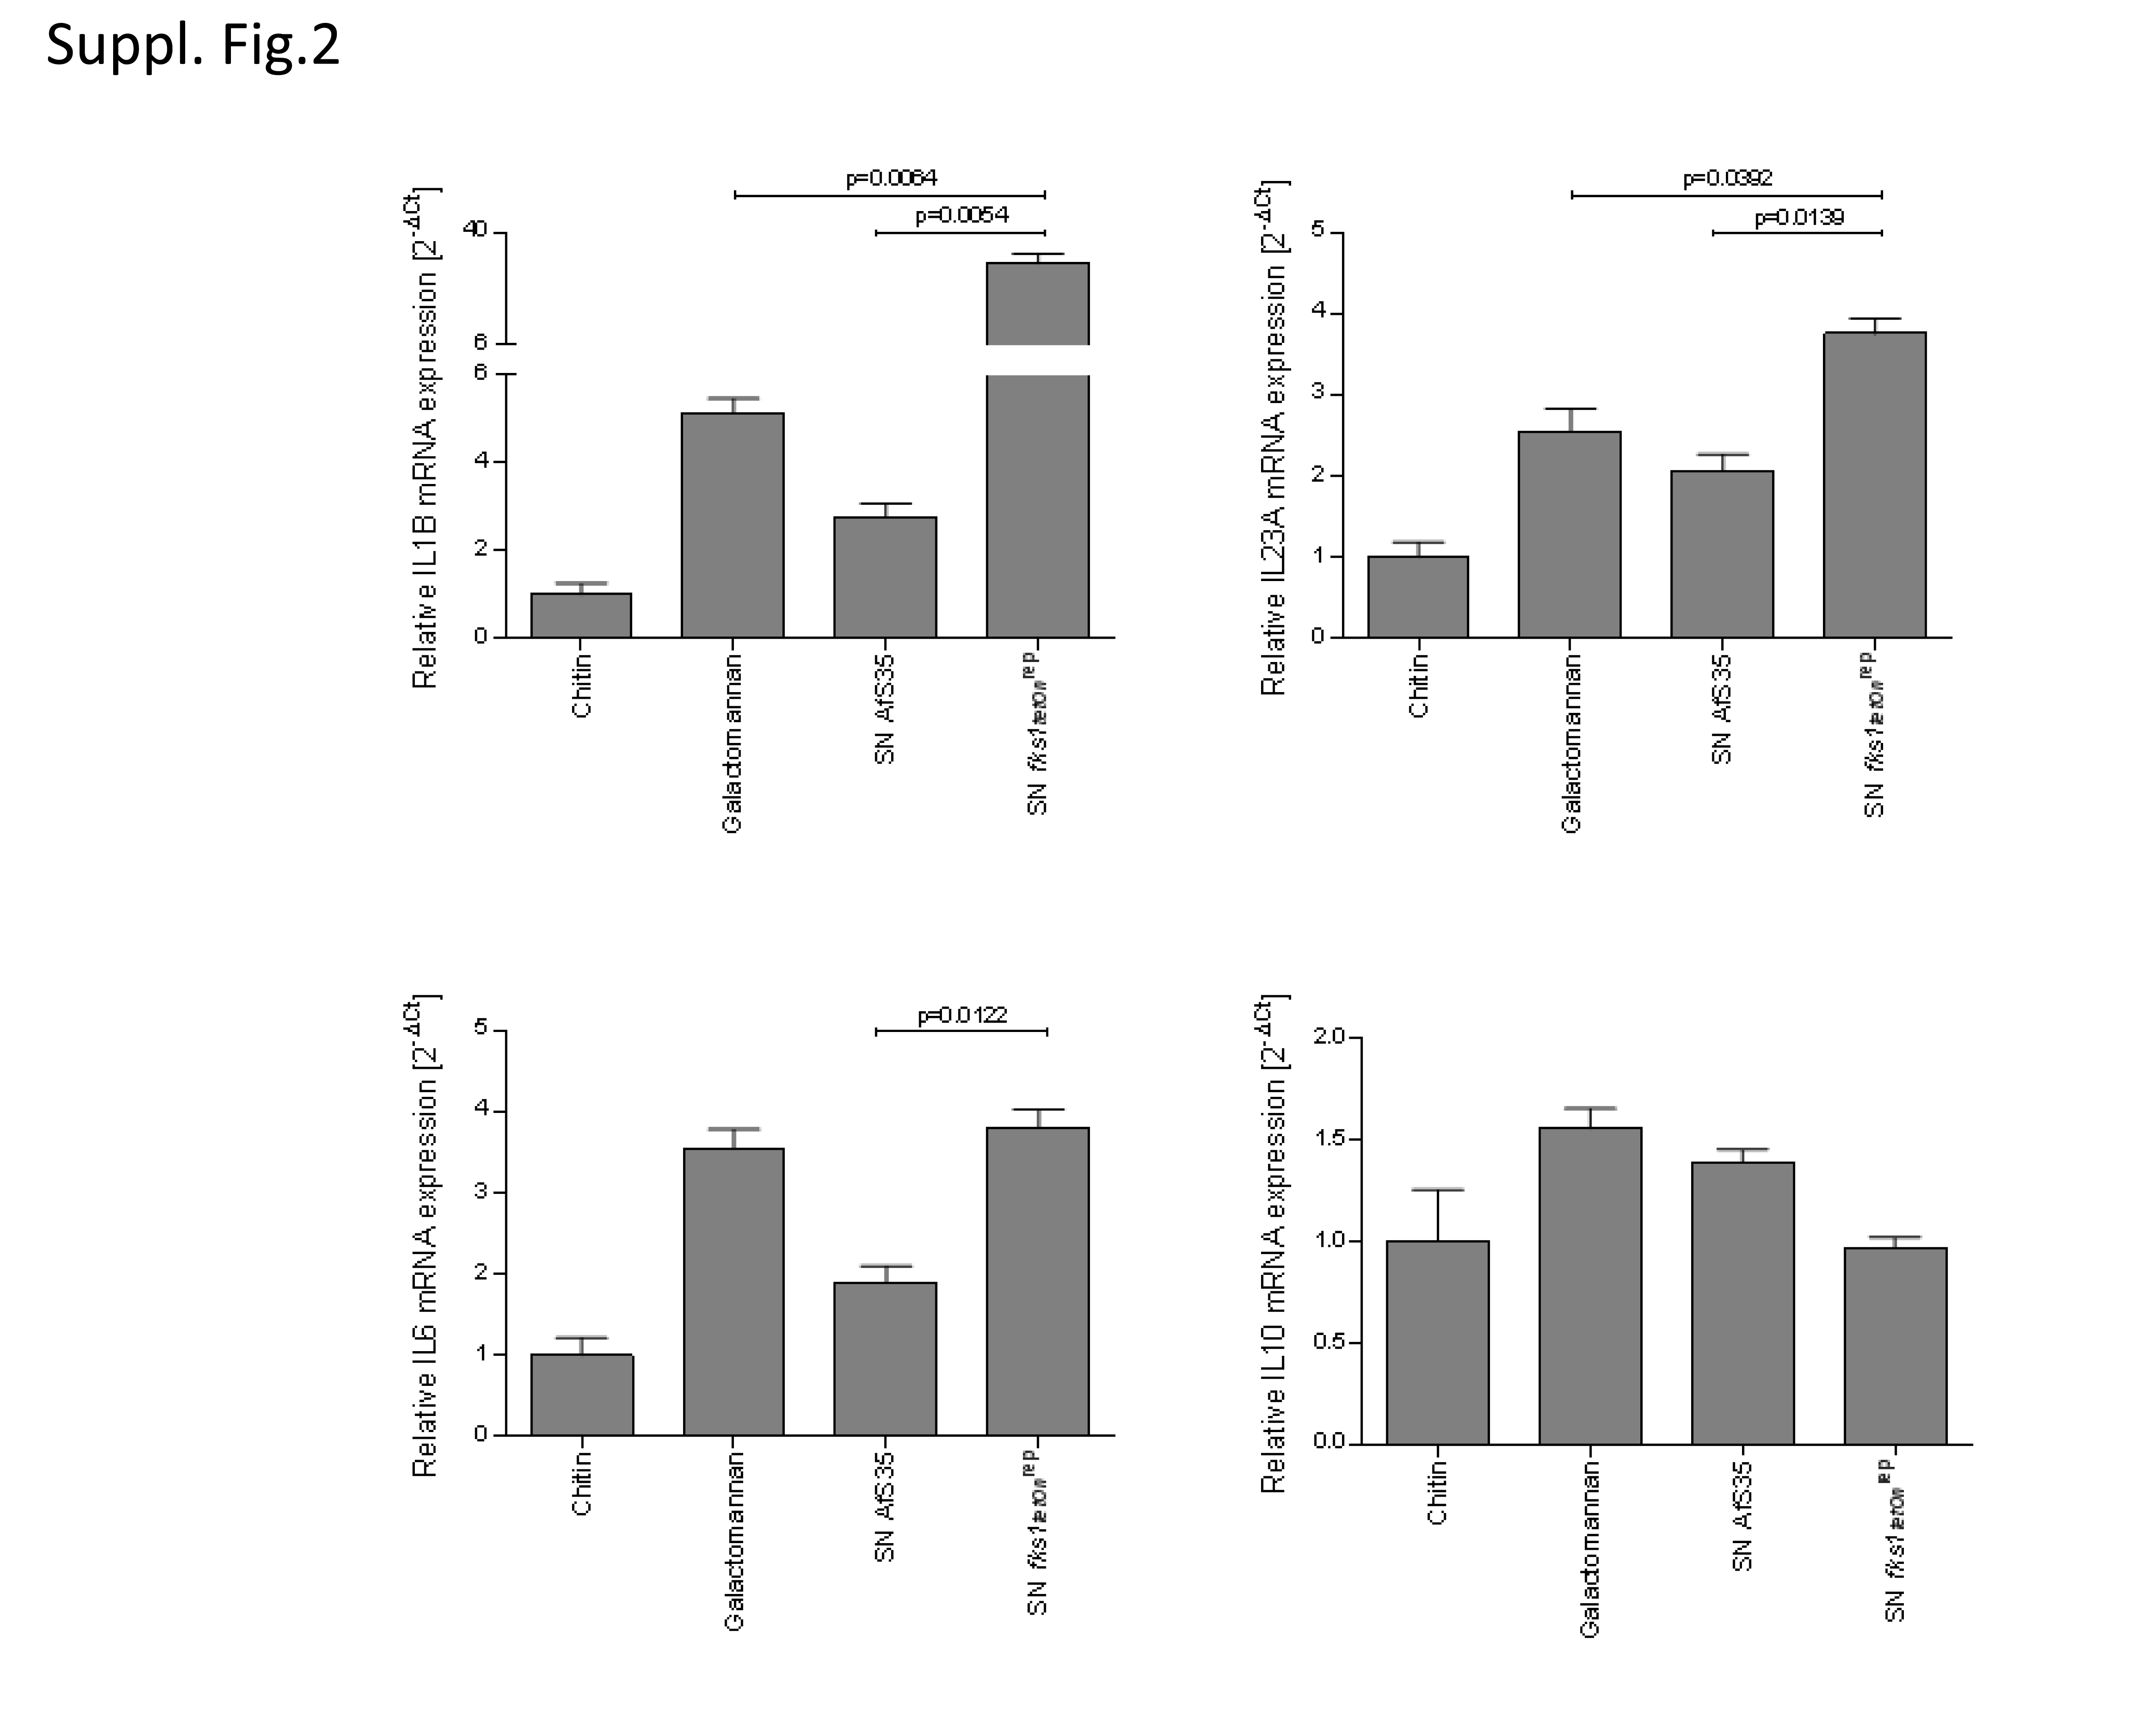

Supplement: Supplementary file 2 [file 3 › Suppl Figure 2.tif]

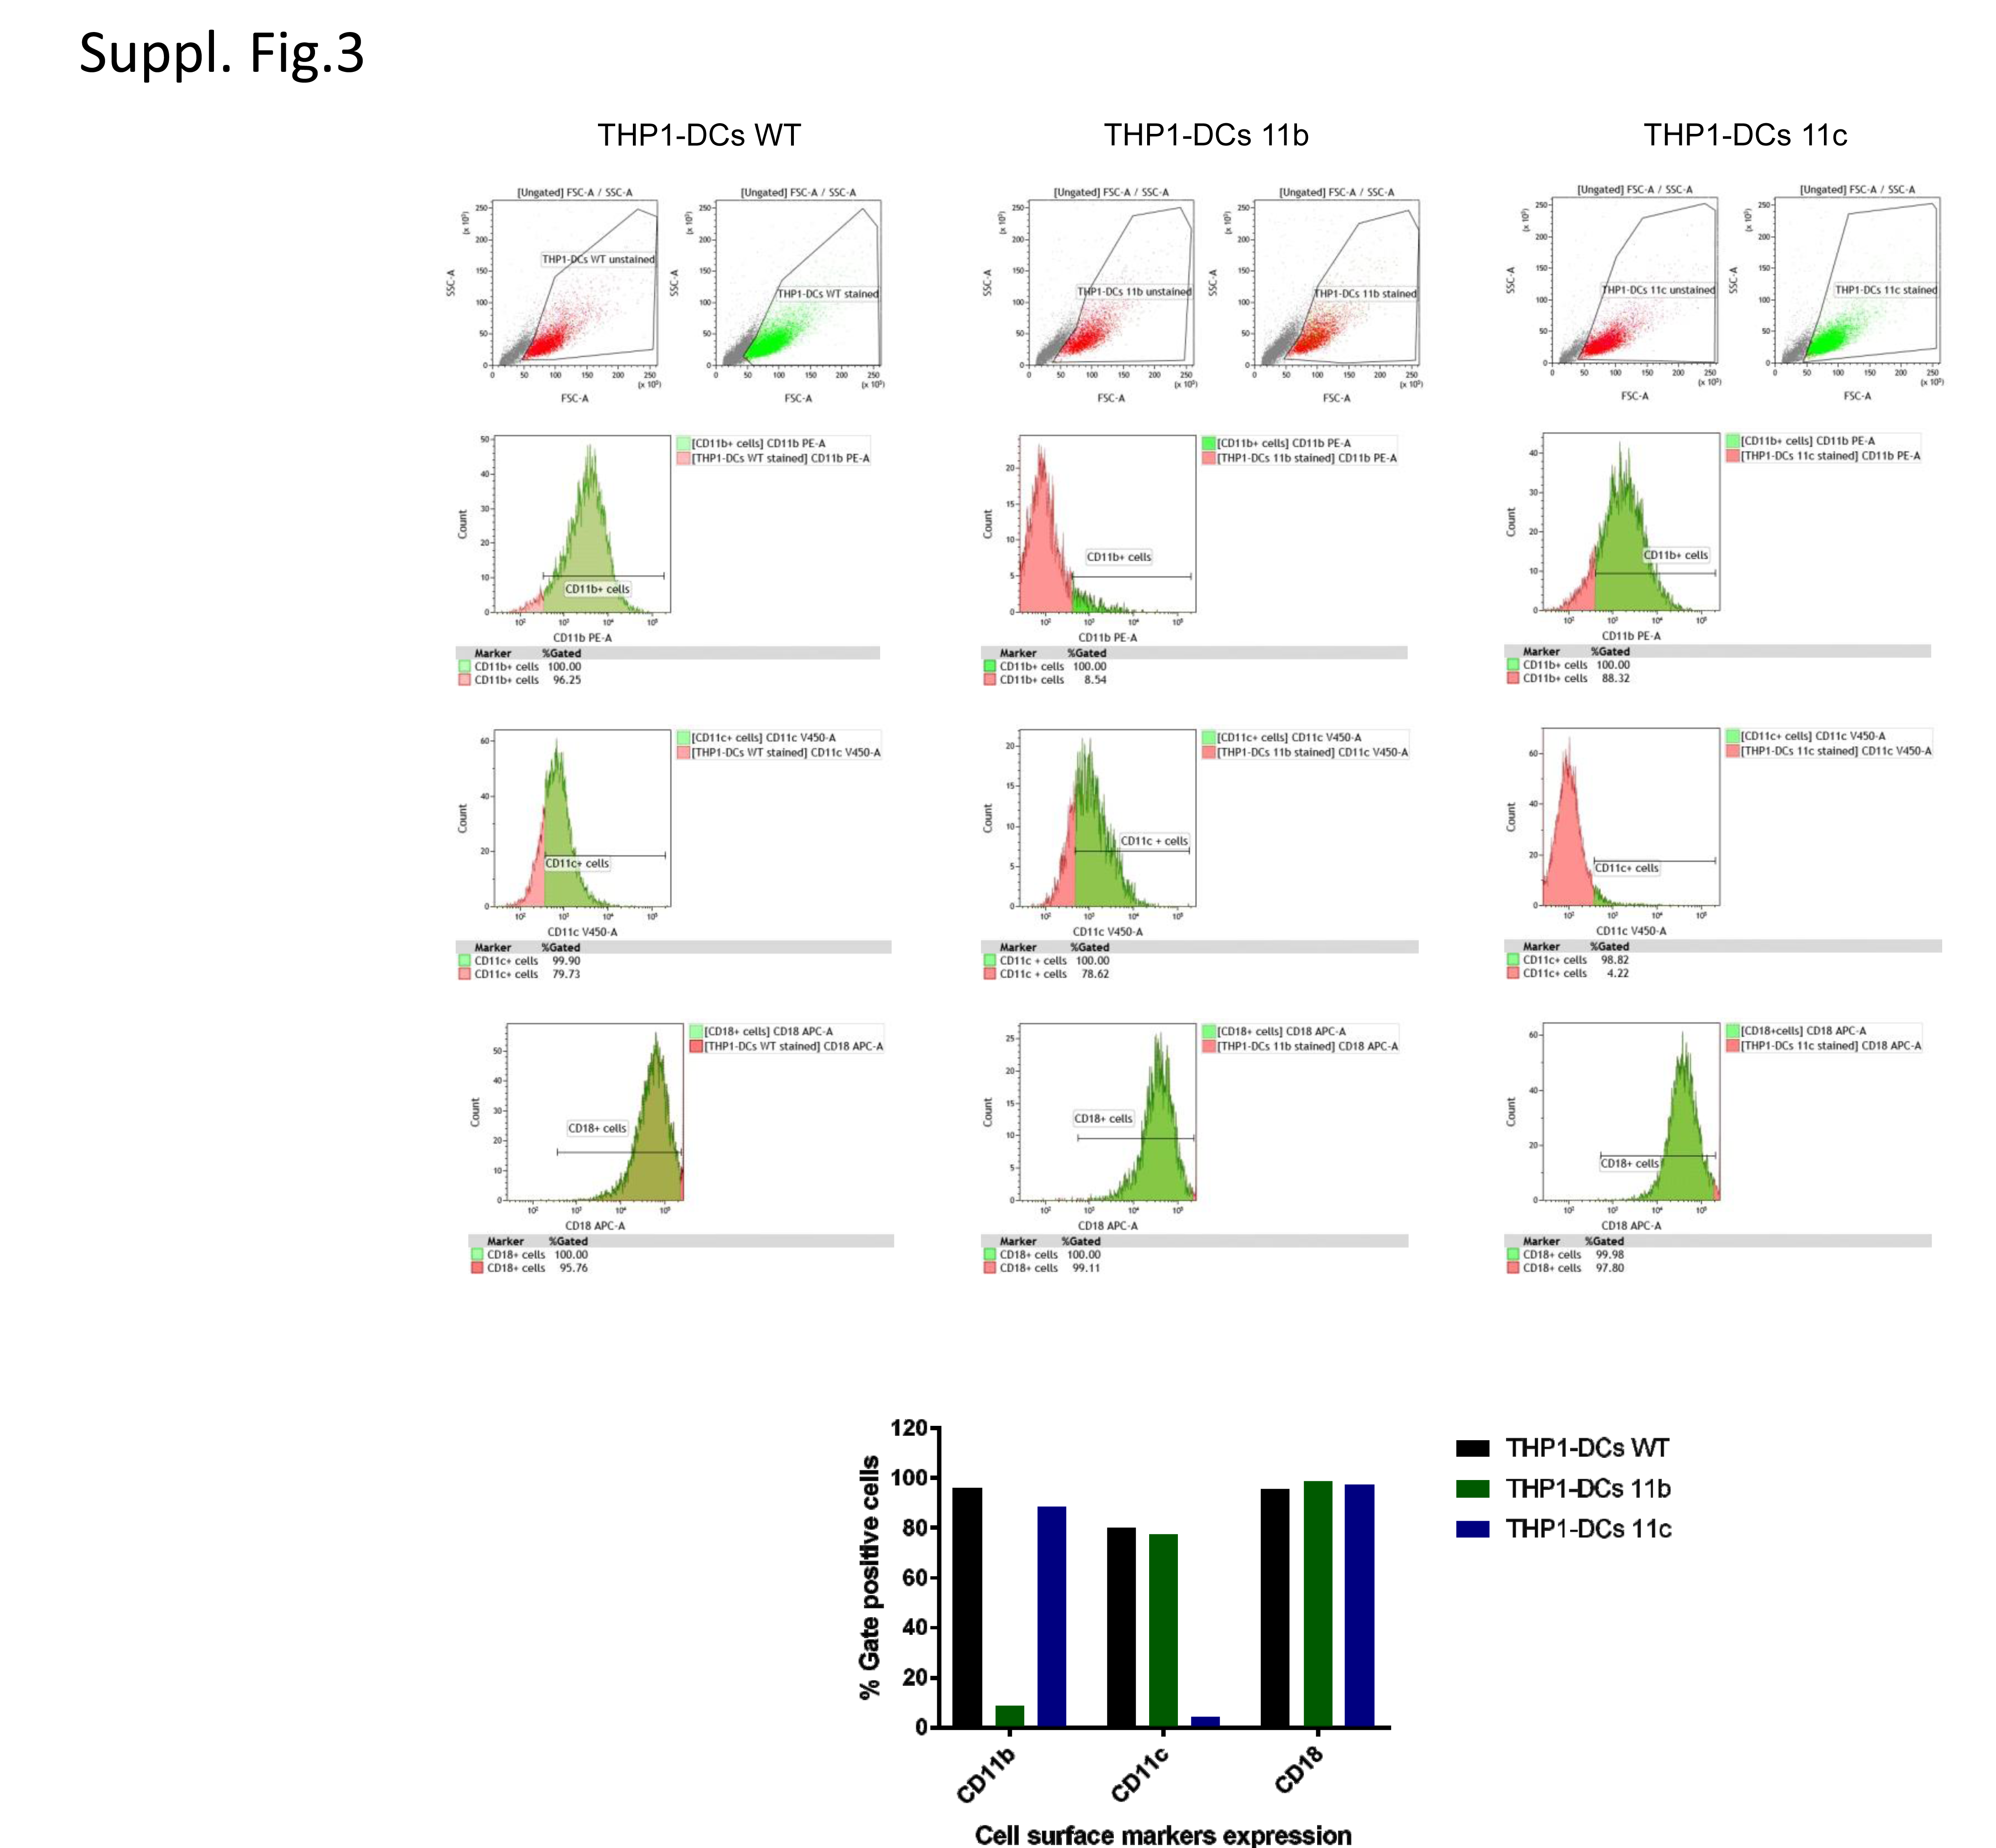

Supplement: Supplementary file 2 [file 3 › Suppl Figure 3.tif]
